# Supplementary material for: Luminescent lanthanide-polyoxometalates assembling zirconia–alumina–titania hybrid xerogels through task-specified ionic liquid linkage
Source: Royal Society of Chemistry journal article supplement (doi:10.1039/c3ra45281f), 2013-11-05
Supplement: c3ra45281f.pdf [file c3ra45281f.pdf]

## Supporting Information

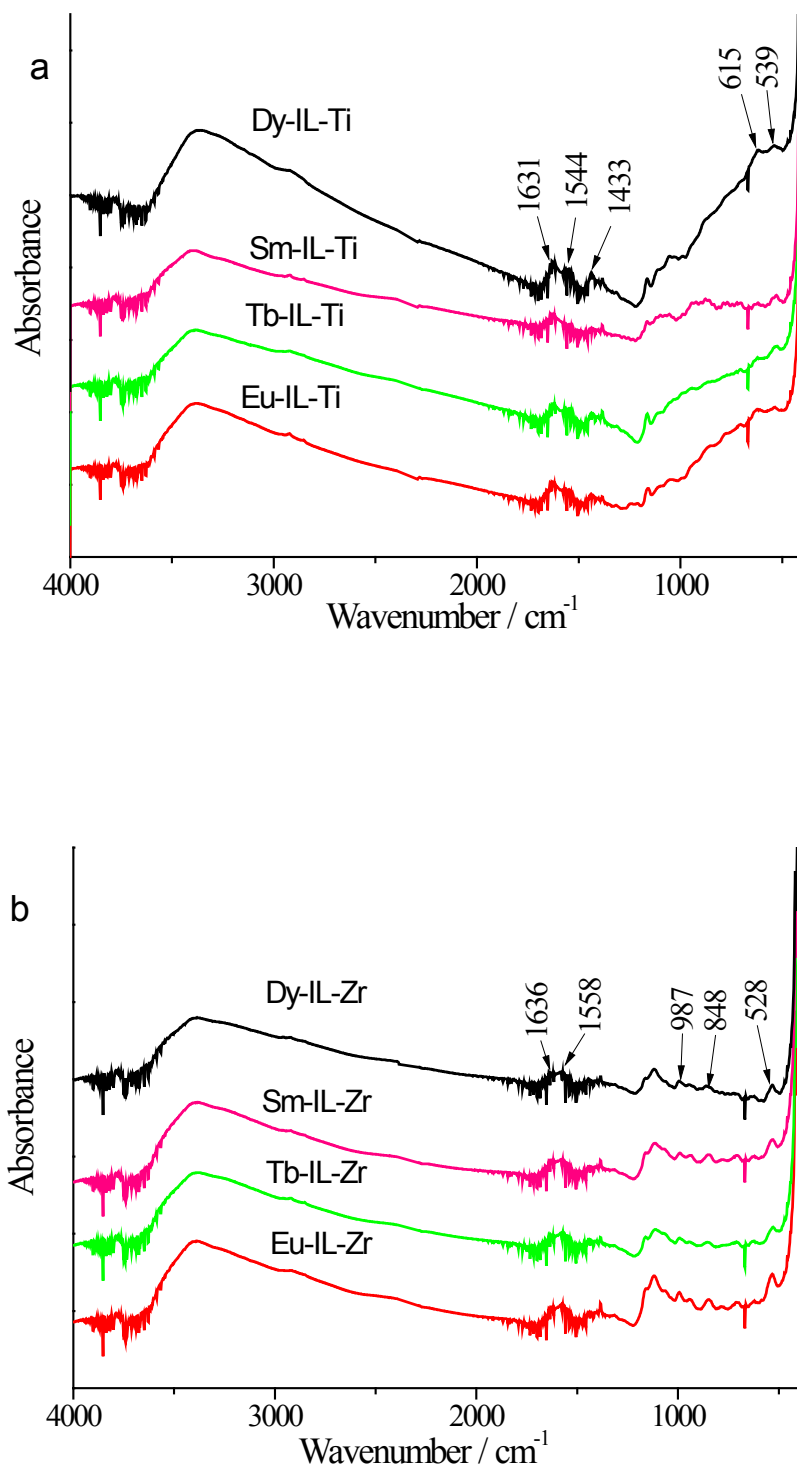

**Figure S1** The Fourier transform infrared spectra of hybrid xerogels Ln-IL-Ti (a); Ln-IL-Zr (b) (Ln = Eu, Tb, Sm, Dy).

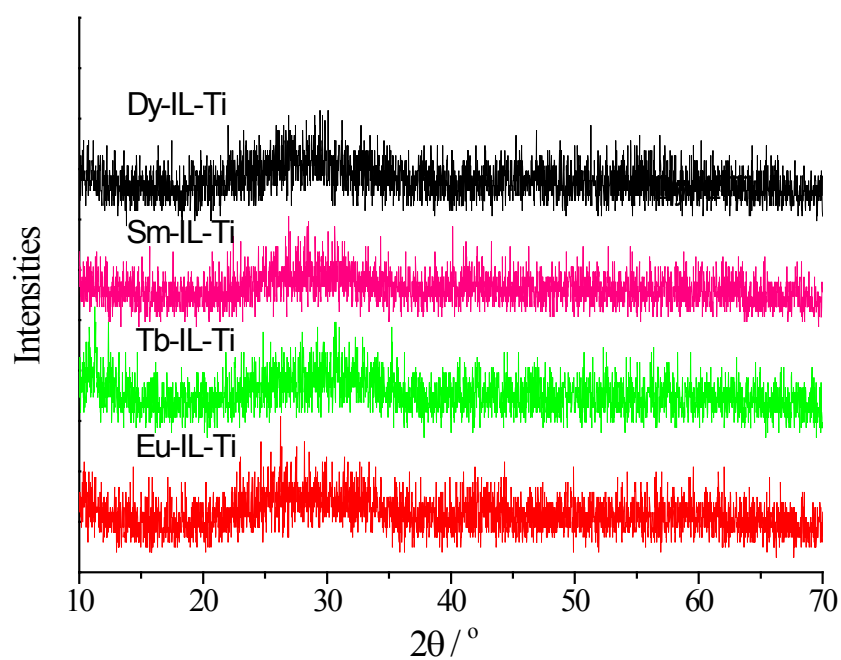

**Figure S2** The selected wide angle X-ray diffraction patterns Ln-IL-Ti hybrid xerogels (Ln = Eu, Tb, Sm, Dy).

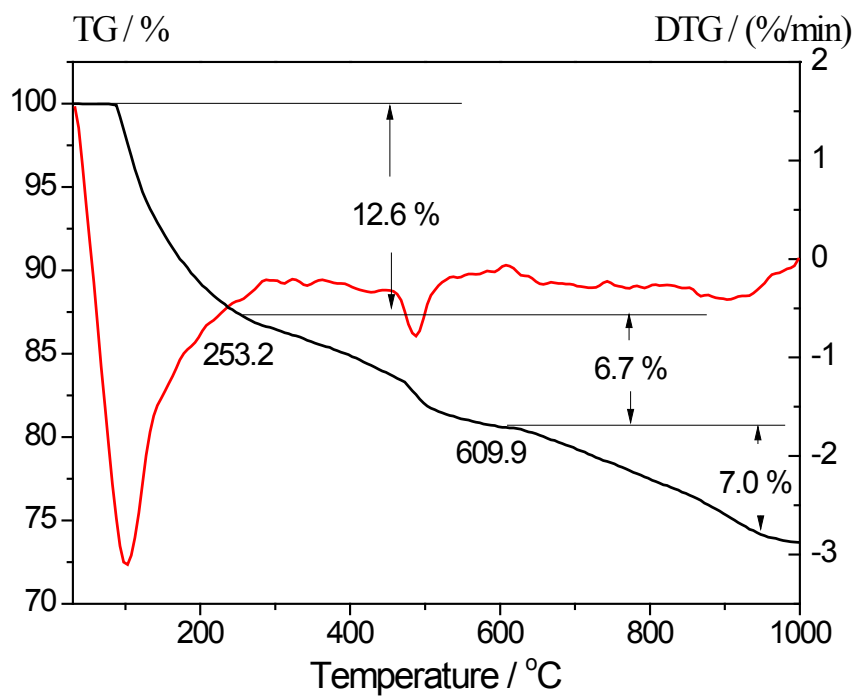

**Figure S3** The selected thermogravimetric and differential thermogravimetry curves of Eu-IL-Zr hybrid xerogel.

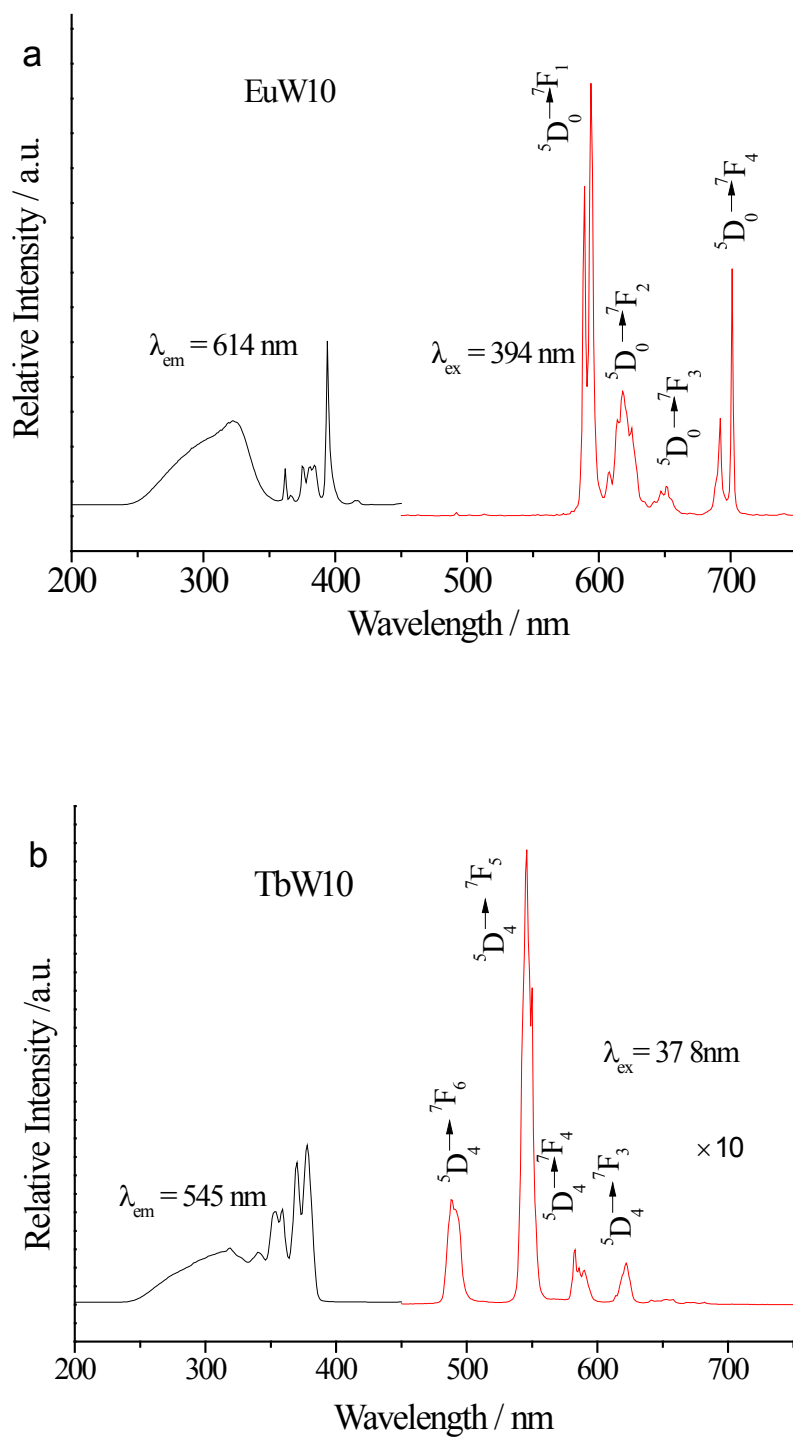

**Figure S4** The excitation and emission spectra of EuW10 (a) and TbW10 (b).

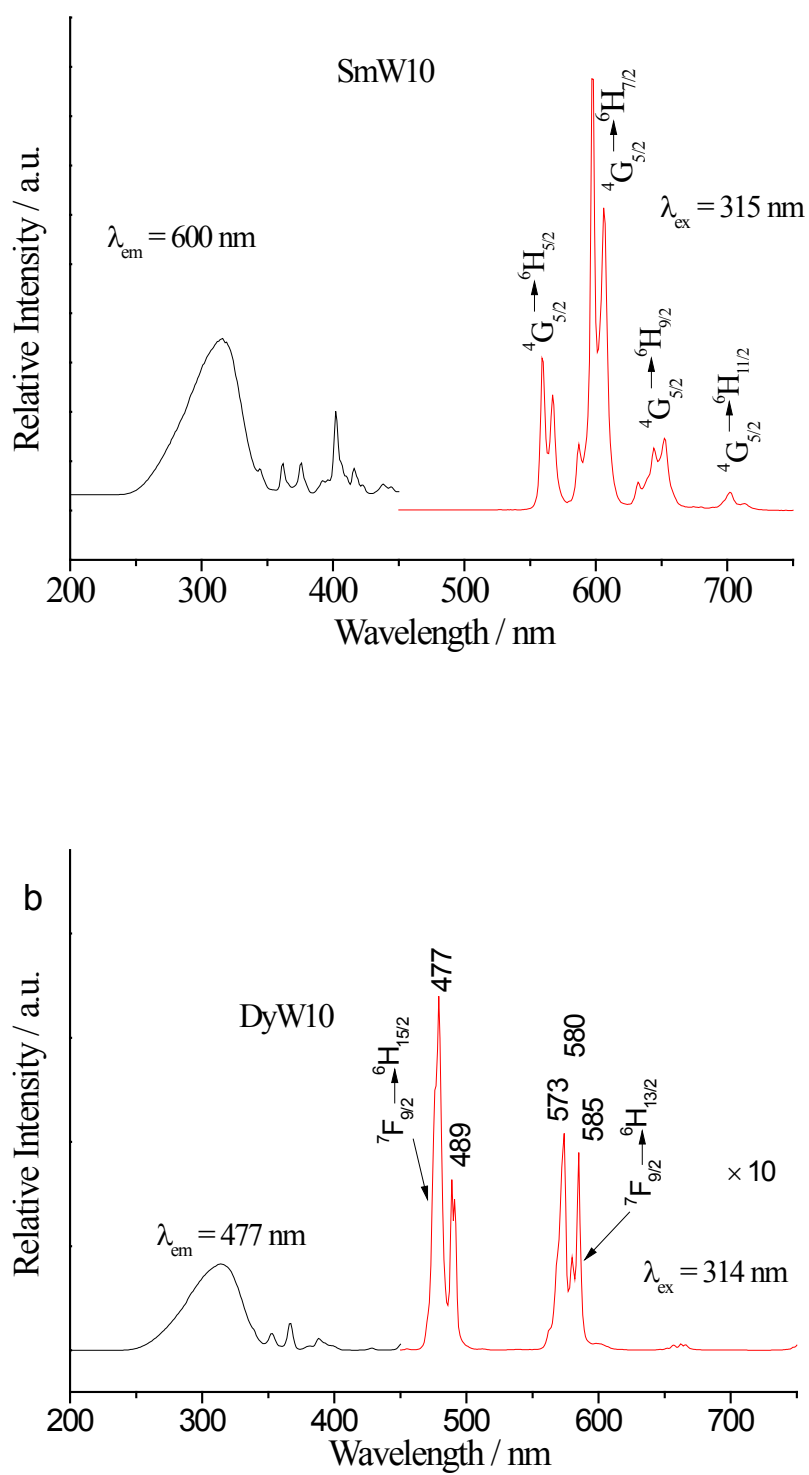

**Figure S5** The excitation and emission spectra of SmW10 (a) and DyW10 (b).

**Table S1** Color coordinates and color of four parent polyoxometalates LnW10 and twelve derived hybrid xerogels Ln-IL-M, (Ln = Eu, Tb, Sm, Dy, M = Al, Ti, Zr).

| Materials             | <i>x</i> | <i>y</i> | $\lambda_{ex}$ / nm | Color        |
|-----------------------|----------|----------|---------------------|--------------|
| Na <sub>9</sub> EuW10 | 0.5772   | 0.4154   | 394                 | Orange       |
| Na <sub>9</sub> TbW10 | 0.3121   | 0.6003   | 378                 | Green        |
| Na <sub>9</sub> SmW10 | 0.5772   | 0.4154   | 315                 | Orange       |
| Na <sub>9</sub> DyW10 | 0.318    | 0.3486   | 314                 | White        |
| Eu-IL-Al              | 0.6214   | 0.3762   | 303                 | Orange       |
| Eu-IL-Ti              | 0.3793   | 0.4055   | 290                 | Nearly white |
| Eu-IL-Zr              | 0.4687   | 0.5089   | 300                 | Yellow       |
| Tb-IL-Al              | 0.3118   | 0.5725   | 300                 | Green Yellow |
| Tb-IL-Ti              | 0.3618   | 0.4119   | 290                 | Nearly white |
| Tb-IL-Zr              | 0.3584   | 0.4177   | 300                 | Nearly white |
| Sm-IL-Al              | 0.5797   | 0.4187   | 304                 | Orange       |
| Sm-IL-Ti              | 0.4629   | 0.5139   | 402                 | Yellow       |
| Sm-IL-Zr              | 0.464    | 0.513    | 303                 | Yellow       |
| Dy-IL-Al              | 0.3184   | 0.3519   | 298                 | White        |
| Dy-IL-Ti              | 0.3614   | 0.4091   | 295                 | Nearly white |
| Dy-IL-Zr              | 0.357    | 0.4033   | 300                 | Nearly white |
